# Supplementary material
Source: PubMed Central journal article supplement (PMC3653618)
Supplement: NIHMS456717-supplement-Supplementary_Table.pdf [file NIHMS456717-supplement-Supplementary_Table.pdf]

Supplement Table

*Correlations Between Care Planning Integrity Indicators of Quality and Coordination, Integration, and Restorative Perspective*

| Subconstruct and Indicator     | Quality of Care Planning <sup>a</sup> |        |       |        |        |       |        |        |
|--------------------------------|---------------------------------------|--------|-------|--------|--------|-------|--------|--------|
|                                | F272                                  | F274   | F276  | F278   | F279   | F280  | F281   | F309   |
| <i>Coordination</i>            |                                       |        |       |        |        |       |        |        |
| MDSC Time                      | -.24*                                 |        | -.20* |        |        | -.20* |        | -.32** |
| MDSC Helper Time               |                                       |        |       |        |        |       |        | .30*   |
| <i>Integration</i>             |                                       |        |       |        |        |       |        |        |
| MDS System Assimilated         |                                       | .23*   |       |        | .23*   |       | .23*   |        |
| Care Planning Impact           |                                       | .21*   |       | .32**  | .20*   |       |        |        |
| <i>Restorative Perspective</i> |                                       |        |       |        |        |       |        |        |
| Dressing & Eating              |                                       |        |       |        | .20*   |       |        |        |
| <i>Quality</i>                 |                                       |        |       |        |        |       |        |        |
| F278                           |                                       | .33*** | .23*  |        |        |       |        |        |
| F279                           | .50***                                | .32**  | .21*  | .31**  |        |       |        |        |
| F280                           |                                       |        |       | .33*** | .19*   |       |        |        |
| F281                           | .24*                                  | .26**  |       | .23*   | .42*** |       |        |        |
| F282                           | .31**                                 | .25**  |       |        | .37*** |       | .29**  |        |
| F309                           | .23*                                  | .22*   | .29** | .38*** | .37*** | .25** | .33*** |        |

Notes. Shading encompasses correlations among the indicators of *quality* of care planning.

<sup>a</sup>Detailed description of each F-tag is provided in Table 3.

\* $p < .05$  \*\*  $p < .01$  \*\*\*  $p < .001$
